# Supplementary material for: CRISPR-C: circularization of genes and chromosome by CRISPR in human cells
Source: PubMed Central journal article supplement (PMC6294522; doi:10.1093/nar/gky767), 2018-08-24

# Supplementary Materials for

## **Circularization of genes and chromosome by CRISPR in human cells CRISPR-C: Circularization of genes and chromosome by CRISPR in human cells**

Henrik Devitt Møller <sup>1,†</sup>, Lin Lin <sup>2,†</sup>, Xi Xiang<sup>3,2,5†</sup>, Trine Skov Petersen <sup>2</sup>, Jinrong Huang <sup>1,4,5,6</sup>, Luhan Yang <sup>7</sup>, Eigil Kjeldsen <sup>8</sup>, Uffe Birk Jensen <sup>2,8</sup>, Xiuqing Zhang <sup>3,4,6</sup>, Xin Liu <sup>4,5,6</sup>, Xun Xu <sup>4,5,6</sup>, Jian Wang <sup>4,5,6,9</sup>, Huanming Yang <sup>4,5,6,9</sup>, George M. Church <sup>7,10</sup>, Lars Bolund <sup>2,4,5,11</sup>, Birgitte Regenberg <sup>1,\*</sup>, Yonglun Luo <sup>2,4,5,6,11, †,\* ‡</sup>

<sup>1</sup>Department of Biology, Faculty of Science, University of Copenhagen, Denmark

<sup>2</sup>Department of Biomedicine, Aarhus University, Denmark

<sup>3</sup>BGI Education Center, University of Chinese Academy of Sciences, Shenzhen, China

<sup>4</sup>BGI-Shenzhen, Shenzhen 518083, China

<sup>5</sup>BGI-Qingdao, Qingdao 266555, China

<sup>6</sup>China National GeneBank, BGI-Shenzhen, Shenzhen 518120, China

<sup>7</sup>eGenesis, Inc., Cambridge, MA 02139, USA

<sup>8</sup>Department of Clinical Medicine, Aarhus University, Denmark.

<sup>9</sup>James D. Watson Institute of Genome Science, 310008 Hangzhou, China

<sup>10</sup>Department of Genetics, Harvard Medical School, Boston, MA 02115, USA

<sup>11</sup>Lars Bolund Institute of Regenerative Medicine, BGI-Qingdao, Qingdao 266555, China

<sup>†</sup>These authors contributed equally to this work.

<sup>‡</sup>Lead contact.

\* To whom correspondence should be addressed: Yonglun Luo, Tel: 0045-87167761; Fax: 0045-87 16 77 61; Email: [alun@biomed.au.dk](mailto:alun@biomed.au.dk). Correspondence may also be addressed to Birgitte Regenberg Tel: 0045-35 32 16 80; Fax: 0045-35 32 16 80; Email: [bregenberg@bio.ku.dk](mailto:bregenberg@bio.ku.dk)

### **This PDF file includes:**

Supplementary Text  
Figs. S1 to S21

Table S1-S2

## Supplementary Figure legends

**Fig. S1. TRE-ECC biosensor vector map and sequence.**

**Fig. S2. CAG-ECC biosensor vector map and sequence.**

**Fig. S3. Model of CAG-ECC biosensor induction by CRISPR-pairs.** Mediated by DNA repair, the two simultaneous double-stranded breaks, introduced by transient cell-transfection of CRISPR-pairs Cr1 and Cr2, will lead to formation of [*EGFP<sup>circle</sup>*] and  $\Delta$ *EGFP* or to the inversion of *EGFP*.

**Fig. S4. Testing the CAG-ECC biosensor vector in HEK293T cells.** (A) Graphical map of vector with sites of CRISPR-pairs (Cr1+Cr2). (B) Outline of plasmid assay experiment. (C) Light (LM) and fluorescence microscopy, green (EGFP), red (mCherry). Images (40x) in triplicates of HEK293T cells transfected with CAG-ECC biosensor vector together with Cr1+Cr2. (D) Images of serial sets of control transfection experiments. Tet, tetracycline. Transfection of EGFP plasmid with Cr1+Cr2 served as a positive control for green cells and negative for red cells.

**Fig. S5. CAG-ECC biosensor microscopy assay at higher magnification in HEK293T cells.** (A) Graphical map of the vector showing CRISPR-pairs (Cr1+Cr2). (B) Outline of plasmid assay experiment. (C) Fluorescence microscopy (100x) in different channels; blue (DAPI), green (EGFP), red (mCherry), merged images. Cr1+Cr2, gRNAs; pUC19, negative control transfection, EGFP plasmid, positive EGFP control; white bar, 50  $\mu$ m.

**Fig. S6. Testing the TRE-ECC biosensor vector in HEK293T cells.** (A) Graphical map of vector with sites of CRISPR-pairs (Cr1+Cr2). (B) Outline of plasmid assay experiment. (C) Light (LM) and fluorescence microscopy, green (EGFP), red (mCherry). Images (40x) in triplicates of HEK293T cells transfected with TRE-ECC biosensor vector together with Cr1+Cr2 +/- tetracycline (Tet). (D) Images of control HEK293T cell transfections.

**Fig. S7. TRE-ECC biosensor microscopy assay at higher magnification in HEK293T cells.** (A) showing CRISPR-pairs (Cr1+Cr2). (B) Outline of experiment. (C) Fluorescence microscopy (100x) in different channels; blue (DAPI), green (EGFP), red (mCherry), merged images. Cr1+Cr2, gRNAs; pUC19, negative control transfection; Tet, tetracycline; white bar, 50  $\mu$ m.

**Fig. S8. Assessment of cell clones with integrated CAG-ECC biosensor.** (A, upper part) Outline of stable genomic integration of pCAG-ECC in HEK293T cells. (B) Copy-number DNA evaluation by Southern blot with EGFP-probe after KpnI digestion. (A, lower part) Outline of experiment for assessment of integrated TRE-ECC by CRISPR gRNAs (Cr1+Cr2). (C) FACS gating images of the nine isolated clones and treatment with Cr1+Cr2. (D) Histograms of fluorescence cell percentages of the nine CAG-ECC clones after CRISPR-C and FACS analysis.

**Fig. S9. Integrated TRE-ECC assay of fifteen cell clones.** (A, upper part) Outline of stable genomic integration of TRE-ECC in HEK293T cells. (A, lower part) Outline of CRISPR gRNAs (Cr1+Cr2) assay for assessment of integrated TRE-ECC clones. (B-C) FACS gating images of isolated clones after treatment with Cr1+Cr2 in (B) absence or (C) presence of tetracycline (Tet).

**Fig. S10. Correlation between percentage of GFP+ or mCherry+ median intensity with copy numbers of ECC biosensor.** Correlation was carried for the co-colored cells (GFP+mCherry+), Pearson rank test.

**Fig. S11. Validation of CAG-ECC genotypes after dual-CRISPR.** (A) PCR and Sanger sequencing test of genotypes formed after dual-CRISPR gRNA (Cr1+Cr2) in CAG-ECC clone 2 and clone 4, confirming

*EGFP<sup>inversion</sup>* and [*EGFP<sup>circle</sup>*] formation. C, negative CRISPR control; NC, non-template control. (B) Southern blot, probed with EGFP on HEK293T purified and digested DNA from untreated (C, *KpnI*) and Cr1+Cr2 treated cells (clone 2). X=*XbaI*, H=*HindIII*.

**Fig. S12. Anticipated outcomes after CRISPR-C gene editing.** \*, junction sites after dual-CRISPR restriction with specific gRNAs (scissors) and subsequent repair of DNA breakage sites, mediated by non-homologous end-joining or microhomology mediated end-joining.

**Fig. S13. eccDNA detection by three different purification methods in HEK293T cells.** (A) Map of chromosome 1, 2-3 kb downstream of the *CRP* locus. gRNAs: Cr3, Cr4; diagnostic oligos: p5 to p8. (B) Experimental outline of DNA purification and enrichment of eccDNA by exonuclease (Exo) removal of linear DNA (+, 15U; ++ 90U). (C) Gel-images of corresponding PCR products across the junctions of [*dsCRP<sup>circle chr1:159,708-159,711Mb</sup>*], along with control test for linear DNA (p31+p32) and plasmid DNA (pUC19), using templates before (-Exo) and after exonuclease treatment (+Exo/++Exo) at three different cell concentrations ( $10^5$ ,  $10^4$ ,  $10^2$  cells). Blue rectangles 1 and 2 represent [*dsCRP<sup>circle 1q23.2:0.57 kb</sup>*] PCR product purified from genomic DNA preparation (G.DNA-prep) and cell lysate treated with exonuclease treatment (++Exo), respectively. (D) Chromatograms from Sanger sequencing of PCR products from the [*dsCRP<sup>circle 1q23.2:0.57 kb</sup>*], blue rectangles 1 and 2. C, negative CRISPR control (HEK293T cell lysate); NC, non-template control.

**Fig. S14. Detection of eccDNA by three different purification methods in HMF cells.** (A) Map of chromosome 1, 2-3 kb downstream of the *CRP* locus. gRNAs; Cr3, Cr4; diagnostic oligos; p5 to p8. (B) Experimental outline of DNA purification and enrichment of eccDNA by exonuclease (Exo) removal of linear DNA (+, 15U; ++ 90U). (C) Gel-images of corresponding PCR products across the junctions of [*dsCRP<sup>circle 1q23.2:0.57 kb</sup>*], along with control test for linear DNA (p31+p32) and plasmid DNA (pUC19), using templates before (-Exo) and after exonuclease treatment (+Exo/++Exo) at three different cell concentrations (from  $10^5$  down to  $10^2$  cells). (D) Chromatograms from Sanger sequencing of PCR products, blue boxes, from purification of [*dsCRP<sup>circle 1q23.2:0.57 kb</sup>*] from genomic DNA preparation (G.DNA-prep) and cell lysate. C, negative CRISPR control (HEK293T cell lysate); NC, non-template control.

**Fig. S15. Validation of deletion after CRISPR-pairs at the *UPA* locus.** (A) Map of chromosome 10 map at the *PLAU* (*UPA*) locus. gRNA, Cr5 and Cr6, diagnostic oligos; p9 to p12. (B) Experimental outline. (C) Gel-image of corresponding PCR products across the junctions of the  $\Delta$ *UPA* and corresponding chromatogram from Sanger sequencing, red box.

**Fig. S16. Deletion and inversion validation at the *TRIM28* locus after CRISPR-pairs.** (A) Chromosome 19 map at the *TRIM28* locus. gRNA, Cr7 and Cr8, diagnostic oligos; p13 to p16. (B) Experimental outline. (C) PCR confirmation of the  $\Delta$ *TRIM28* after Cr7+Cr8. (D) PCR and sequencing confirmation of the *TRIM28<sup>inversion</sup>*. C, negative CRISPR control of HEK293T cell lysate.

**Fig. S17. Indel distribution across the junction of [*TRIM28<sup>circle</sup>*] in HEK293T.**

**Fig. S18. CAG-ECC time-course of [*EGFP<sup>circle</sup>*] expression and retention in cell culture.** (A) Outline of time-course experiment. (B) Left, percent fluorescence cells from 1 to 6 cell passages (1:3 split-ratio). (C) Corresponding FACS gating images from B. (D) Outward PCR analysis of [*EGFP<sup>circles</sup>*] at passage 1 to 6. Cr1+Cr2 (1+2), CRISPR gRNAs; C, control – gRNA; ctrl, DNA template control. (E) Quantification of [*EGFP<sup>circles</sup>*] by normalizing to *GAPDH* (solid line) using Image J. Theoretical 1/3 dilution curve was presented as dash line.

**Fig. S19. Genotyping of  $\Delta$ *EGFP*, [*EGFP<sup>circle</sup>*], *EGFP<sup>INV</sup>* of FACS-sorted ECC reporter cells after CRISPR-C.** (A) Presentation of gating examples of FACS-sorted ECC reporter cells after CRISPR-C; P1-

P4 represent the different population of cells. (B) PCR genotyping. *GAPDH* was used as internal control. (C) Quantification of PCR genotyping results from (B) by Image J.

**Fig. S20. Dot plots of fluorescent intensity (GFP), GFP+ cell counts in control and CRISPR-C treated ECC reporter cells over 6 passages.** Control (CTRL) cells were transfected with a pUC19 control plasmid, and CRISPR-C treated cells were treated with Cr1+Cr2.

**Fig. S21. Metaphase spreads and FISH of telomere and whole chromosome 18 painting.** Karyotyping of chromosome 18 in wildtype (WT) HEK293T cells and after treatment with CRISPR-pairs (Cr1+Cr2), using telomere staining (Telo) and whole chromosome 18 painting (WCP18). Blue, DAPI; Red, telomere; Cyan, chromosome 18.

## Supplementary Tables

**Table S1**

| gRNA name | 5'-3' (sense)                     | 3'-5' (anti-sense)         | hg38 region | CRISPR target         |
|-----------|-----------------------------------|----------------------------|-------------|-----------------------|
| Cr1       | <u>CACCGAGAGCCCCAGAGACCGGCAC</u>  | AAACGTGCCGGTCTCTGGGGCTCTC  | -           | ECC-biosensor         |
| Cr2       | <u>CACCGCTTGAACCGCTCCCGGCTTG</u>  | AAACCAAGCCGGGACGCGTTCAAGC  | -           | ECC-biosensor         |
| Cr3       | <u>CACCGTGATAGCTCTAAAAGCACA</u>   | AAACTGTGCTTTTAGAGCTATCAC   | 1q23.2      | <i>dsCRP</i>          |
| Cr4       | <u>CACCGATAATTGCTTAATCACACA</u>   | AAACTGTGTGATTAAGCAATTATC   | 1q23.2      | <i>dsCRP</i>          |
| Cr5       | <u>CACCGTGGCCACACAATGTGAGG</u>    | AAACCTCACATTTGTGTGGCCAC    | 10q22.2     | <i>uPA</i>            |
| Cr6       | <u>CACCGACAAGTTGGGAAGGCTTCA</u>   | AAACTGAAGCCTTCCCACTTGTCT   | 10q22.2     | <i>uPA</i>            |
| Cr7       | <u>CACCGAGAGCGCTGCGACCCGAG</u>    | AAACCTCGGGTCGACGGCCTCTC    | 19q13.43    | <i>TRIM28</i>         |
| Cr8       | <u>CACCGTGCTTCTCCAAGACATCG</u>    | AAACCGATGTCTTTGGAGAAGCAC   | 19q13.43    | <i>TRIM28</i>         |
| Cr9       | <u>CACCGAGCTGGTCAGTAACCTCTCT</u>  | AAACAGAGAGTTACTGACCCAGCTC  | 1q23.1      | chr1                  |
| Cr10      | <u>CACCGTGAGATCTCGGAAAAAGC</u>    | AAACGCTTTTCTCCAGGATCTCAC   | 1q23.1      | chr1                  |
| Cr11      | <u>CACCGTGAAGACAAAATCCATTAA</u>   | AAACTTAATGGAATTTGTCTTCCAC  | 1q23.1      | chr1                  |
| Cr12      | <u>CACCGAGTTCTCAGTCCACCATTAA</u>  | AAACTTAATGGTGGACTGAGAATC   | 1q23.1      | chr1                  |
| Cr13      | <u>CACCGTAAGGCTTTTATTGCAGG</u>    | AAACCTGCAATAAAAAGCCTTAC    | 1q23.1      | chr1                  |
| Cr14      | <u>CACCGATTAGGAGGTGAGAACTTG</u>   | AAACCAAGTTTCTGACCTCCTAATC  | 1q23.1      | chr1                  |
| Cr15      | <u>CACCGAAGGTGACCTTCAAATTTGT</u>  | AAACACAAAATTTGAAGTCCACCTTC | 1q23.1      | chr1                  |
| Cr16      | <u>CACCGTGGCATAACAAGAAATAATGA</u> | AAACTCATTATTTCTTGTATGCCAC  | 1q23.1      | chr1                  |
| Cr17      | <u>CACCGATGGTCAGTGTCTCGTGGGC</u>  | AAACGCCCCACGAGACACTGACCATc | 18p11.22    | Ring-chr1 (left arm)  |
| Cr18      | <u>CACCGATTGGTCAGATGTCTGCCAA</u>  | AAACTTGGCAGACATCTGACCAATc  | 18p11.22    | Ring-chr1 (left arm)  |
| Cr19      | <u>CACCGTGCTGATTACTATGAGGTA</u>   | AAACTACCTCATAGTAATCAGCAC   | 18q21.2     | Ring-chr1 (right arm) |
| Cr20      | <u>CACCGCTCAGGAAATCATCATTGC</u>   | AAACGCAATGATGATTTCTGAGC    | 18q21.2     | Ring-chr1 (right arm) |

**Table S2.**

| PCR target                     | PCR test          | 5'- 3' Forward           | 5'- 3' Reverse           | Expected size (bp) | hg38 region      | Oligo ID |
|--------------------------------|-------------------|--------------------------|--------------------------|--------------------|------------------|----------|
| <i>PLAU (uPA)</i>              | Deletion/wt       | TACGAACAGGGTGGGGGAGAG    | TGCCAACGGACATTTAAAGATGTC | 258+654            | 10q22.2          | p9 + p12 |
| <i>PLAU (uPA)</i>              | EccDNA            | AGTGGAAAGTGGTAAGGGGTGGC  | ATTGGGGACAGGGAGGGATGG    | 199                | 10q22.2          | p10+p11  |
| <i>dsCRP_2kb</i>               | Deletion/wt       | CTCCGCTTGCAC TAGGGGTAT   | GGTTGCTGACTTGCCTGGATT    | 639 +1232          | 1q23.2           | p8+p5    |
| <i>dsCRP_2kb</i>               | EccDNA            | TGCTTCTTTAAACGTGACCACCT  | GGTCTTCCCCTTAGCCTACTTCT  | 530                | 1q23.2           | p6+p7    |
| <i>dsCRP_2kb</i>               | Inversion         | GGTTGCTGACTTGCCTGGATT    | GGTCTTCCCCTTAGCCTACTTCT  | 453                | 1q23.2           | p5+p7    |
| <i>dsCRP_2kb</i>               | Inversion +/-SINE | CTCCGCTTGCAC TAGGGGTAT   | TGCTTCTTTAAACGTGACCACCT  | 756+500            | 1q23.2           | p8+p6    |
| <i>TRIM28</i>                  | Deletion/wt       | AGCCTCGGCCTTCGCCTCAGCC   | GTTCGCATCTGGGGTGGGTG     | 171+661            | 19q13.43         | p13+p16  |
| <i>TRIM28</i>                  | EccDNA            | TGTAAACAGTCTCCACATCCCT   | TCGTATGCAGGACCCAGAAAGTA  | 297                | 19q13.43         | p14+p15  |
| <i>TRIM28</i>                  | Inversion         | TCGTATGCAGGACCCAGAAAGTA  | GTTCGCATCTGGGGTGGGTG     | 340                | 19q13.43         | p15+ p35 |
| pUC19                          | Plasmid control   | CTGCAGGTGACTCTAGAGGAT    | CCATTCAAGGTGGCAACTG      | 195                | -                | p33+ p34 |
| <i>EGFP (ECC biosensor)</i>    | Deletion/wt       | GTTATCTCTCTCGCCCTTGC     | TCCGTACCACTTCCTACCCT     | 142+2059           | -                | p4+p0    |
| <i>EGFP (ECC biosensor)</i>    | EccDNA            | AAGGGATGGTGGTGGTGG       | GTGCTGCTTCATGTGGTCGG     | 361                | -                | p1+p3    |
| <i>EGFP (ECC biosensor)</i>    | Inversion         | AACAGTCTCTCGCCCTTGC      | TCOGTACCACTTCCTACCCT     | 127                | -                | p2+p0    |
| <i>mCherry (ECC biosensor)</i> | Inversion         | AAGGGATGGTGGTGGTGG       | GTTATCTCTCTCGCCCTTGC     | 156                | -                | p1+p4    |
| <i>dsCRP_106kb</i>             | EccDNA            | TGCTTTATGTCACATTGCTTTGC  | TGCTTCTTTAAACGTGACCACCT  | 666/756            | 1q23.1           | P24+P19  |
| <i>dsCRP_106kb</i>             | Linear DNA        | CACAAAAGGGCGTAGAGTTACC   | GGTTGCTGACTTGCCTGGATT    | 591/500            | 1q23.1           | P23+P17  |
| <i>dsCRP_52kb</i>              | EccDNA            | TCAAGGTCTTTTATACCCAAGTCA | TGCTTCTTTAAACGTGACCACCT  | 617                | 1q23.1           | P21+P17  |
| <i>dsCRP_52kb</i>              | Linear DNA        | AGACGCCTCTGTACATCC       | GGTTGCTGACTTGCCTGGATT    | 788                | 1q23.1           | P22+P17  |
| <i>dsCRP_54kb</i>              | EccDNA            | CATCTGGGTCTAGCGCATTT     | TGCTTCTTTAAACGTGACCACCT  | 785                | 1q23.1           | P21+P17  |
| <i>dsCRP_54kb</i>              | Linear DNA        | GACATTCTCTCTAGCTCCCC     | GGTTGCTGACTTGCCTGGATT    | 833                | 1q23.1           | P22+P17  |
| <i>upCRP_101kb</i>             | EccDNA            | GGTTGCTGACTTGCCTGGATT    | TTAGTCCATCTGCCACTGAGC    | 724/707            | 1q23.1           | P17+P25  |
| <i>upCRP_101kb</i>             | Linear DNA        | TGCTTCTTTAAACGTGACCACCT  | ATTAAGTCTTCCATGTGCC      | 615/635            | 1q23.1           | P19+P26  |
| <i>upCRP_12kb</i>              | EccDNA            | GGTTGCTGACTTGCCTGGATT    | TCAAACACTATGGGAATGAGGC   | 672/680            | 1q23.1           | P19+P20  |
| <i>upCRP_12kb</i>              | Linear DNA        | TGCTTCTTTAAACGTGACCACCT  | GTGACCCCTTAATCAATCTCTCC  | 763/763            | 1q23.1           | P17+P18  |
| <i>CRP_207kb</i>               | EccDNA            | TGCTTTATGTCACATTGCTTTGC  | TTAGTCCATCTGTCCACTGAGC   | 589/686            | 1q23.1           | P24+P25  |
| <i>CRP_207kb</i>               | Linear DNA        | CACAAAAGGGCGTAGAGTTACC   | ATTAAGTCTTCCATGTGCC      | 573/479            | 1q23.1           | P23+P26  |
| <i>Ring-chrom 18</i>           | EccDNA            | CATGGAAGTTGGACAACAATGCTG | AGGATTACTCTGGTACCTGGCATG | 562/478/505/421    | 18p11.22-18q21.2 | P28+P29  |
| <i>Ring-chrom 18</i>           | Linear DNA        | CTCCAAACAAACAGCTGAGCGTCC | ATCAGCACAGCACCATTAGGTAC  | 541/641/597/681    | 18p11.22-18q21.2 | P27+P30  |

wt=wildtype; up=upstream; ds=downstream

Fig. S1

pCAG-ECC biosensor vector

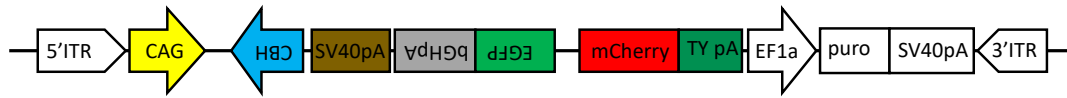

5' ...GACATTGATTATTGACTAGTTATTAATAGTAATCAATTACGGGGTCATTAGTTCATAGCCATATATGGAGTTCGCGTTACATAACTTACGGT  
AAATGGCCCGCTGGCTGACCGCCAACGACCCCGCCATTGACGTCAATAATGACGTATGTTCCCATAGTAACGCCAATAGGGACTTCCATTGA  
CGTCAATGGGTGGAGTATTTACGGTAAACTGCCCACTTGGCAGTACATCAAGTGTATCATATGCCAAGTACGCCCCCTATTGACGTCAATGACGGTA  
AATGGCCCGCTGGCATTATGCCAGTACATGACCTTATGGGACTTTCCTACTTGGCAGTACATCTACGTATTAGTCATCGCTATTACCATGGTCGA  
GGTGAGCCCACTTCTGCTTCACTCTCCCATCTCCCCCCTCCCAACCCCAATTTGTATTTATTTATTTTAAATTTTGTGCAGCGATG  
GGGCGGGGGGGGGGGCGCGCCAGCGGGGCGGGGCGGGGCGAGGGCGGGGCGGGCGAGAGGTGCGGCGGCCAATCAGA  
GCGGCGGCTCCGAAAGTTCTTTTATGGCGAGGCGGCGGGCGGCGCCCTATAAAAAGCAAGCGCGGGGGGAGTCGCTGCGACGC  
TGCCTTCGCCCCGTGCCCGCTCCGCGCGCCCTCGCGCGCCCGCCCGGCTCTGACTGACCGGTTACTCCACAGGTGAGCGGGCGGACGGCC  
CTTCTCCTCCGGGCTGTAATTAGCGCTTGGTTTAAATGACGGCTTGGTTCTTTTCTGTGGCTGCGTGAAAGCCTTGAGGGGCTCCGGGAGGGCCCTT  
GTGCGGGGGAGCGGCTCGGGGGTGCCTGCGTGTGTGTGCGTGGGAGCGCCCGTGCGGCTCCGCGCTGCCGCGGCTGTGAGCGCTCGGG  
CGCGGCGGGGCTTTGTGCGCTCCGCAGTGTGCGGAGGGGAGCGCGGGCGGGGCGGTGCCCGCGGTGCGGGGGGGCTGCGAGGGAACAAAG  
GCTGCGTGGGGGTGTGTGCGTGGGGGTGAGCAGGGGTGTGGGCGCTCGGTGCGGCTGCAACCCCTGCAACCCCTCCCGAGTGTGCTGA  
GCACGGCCGGCTTCGGTTCGGGGCTCCGTACGGGGCTGCGCGGGGCTCCCGTCCGGGCGGGGGTGGCGGAGTGGGGTCCGGGGCGG  
GCGGGGCGCTCGGGCGGGGAGGGCTCGGGGAGGGGCGGCGGGCCCGGAGCGCGGGCGGTGTGAGGCGGGCGAGCCGACCCATTGCC  
TTTTATGGTAATCGTGCAGAGGGCGCAGGGACTTCTTTGTCCCAAATCTGTGCGGAGCCGAAATCTGGGAGGCGCGCGCACCCCTCTAGCGG  
GCGCGGGCGAAGCGGTGCGGCGCGGCGAGGAAGAAATGGGCGGGGAGGGCCTTCGTGCGTGCAGCGCGCGCGCTCCCTTCTCCTCTCAGCCT  
CGGGGCTGTCGCGGGGGAGCGGCTGCCTTCGGGGGGACGGGCGAGGGCGGGGTTCGGCTTCTGGGCTGTGACCGGCGGCTCTAGAGCCTCTGCTA  
ACCATGTTTCATGCTTCTTCTTTTCTACAGTCTCTGGGCAACGTGCTGTTATTGTGCTGTCTCATATTTGGCAAAGAACTAGATACCCTCG  
TAAAGGCTAGAGCTAGCGAAATTCGGGGCACAGAGCCCGAGACCGGACCGGTCCAACCTGAAAAAAGTGATTTTCAGGCGGTGCTCCAGGTAA  
TTAAACATTAATACCCCAACCAACCAACCTTAAACCTTACCTTCTGCTCAGTAATTAACAGCCGGAGGAGAGGGCGCTCCCGCCGCTCA  
CCTGTGGGAGTAACCGGTCAGTCAGAGCCGGGCGGGCGGCGGAGGCGGGCGGAGCGGGGCAAGGCAGGTCGACGCGACTCCCG  
CCGCGCGCGCTTCGCTTTTTATAGGCGCGCGCGCGCCCGCTCGCCATAAAGGAAACTTTCGAGCGCGCGCTCTGATTGGCTGCCCGCG  
ACCTCTCCGCTCGCCCCGCCCCCTCGCCCCGCCCCCGCTGGCGCGCGCCCCCCCCCCCCCCCCCCCCCATCGCTGCACAAAATAAT  
TAAAAATAAATAAATAAATAAATGGGGTGGGGAGGGGGGAGATGGGAGAGTGAAGCAGAACGTTGGGCTCACCTCGACCATGGTAATAGCA  
TGACTAATACGTAGATGACTGCCAAGTAGGAAAGTCCATAAGTCAATGACTGCGGCAATGCCAGCGGGCCATTTACCTCATTGACGTGCA  
AGGGGGCTACTTGGCATATGATACACTTGATGTACTGCCAAGTGGGAGTTTACCGTAAATCTCCACCAATTGACGTAATGAAAGTCCCTATT  
GGCGTTACTATTGACGTAATGGGCGGGGTCGTTGGGCGTCAGCCAGGCGGGCCATTTACCGTAAGTTATGTAACGGGTACCTCTAGAGCCATT  
GTCTGCATAAAGCAATAGCATCACAAATTTACAAATAAAGCATTTTTTTCTACTGCGCATAGAGCCACCGATCCCCAGCATGCTGCTATGTG  
TTCCCAATCTCCCTTGTGCTGCTGCCCCACCCACCCCGAATAGAAATGACACCTACTCAGACAATGCGATGCAATTTCTCATTTTTATTAG  
GAAAGGACAGTGGGAGTGGCACCTTCCAGGGTCAAGGAAGGCACGGGGAGGGGCAACAACAGATGGCTGGCAACTAGAAAGGCACAGTCGAGGCTG  
ATCGGCGCTCTAGAATAGTGGATCCCCGGGCTGCATCAACCTCGAGTTACTTGTACAGTCTGTCATGCGGAGAGTGAATCCCGCGGGTCA  
CGAACTCCAGCAGGACCATGATGATCGCGCTTCTCGTTGGGGTCTTGTCTCAGGCGGACTGGGTGCTCAGGTAGTGGTTGTGCGGCAGCAGCAGGG  
GCCGTCGCGATGGGGTGTCTGCTGGTAGTGGTCCGCGAGTGCACGCTGCGCTCTCGATGTTGTGGCGGATCTGAAAGTTCACCTTGTATGCC  
TTCTTCTGCTTGTGCGCCATGATATAGAGCTTGTGGCTGTGTAGTTGTACTCCAGCTTGTGCCCCAGGATGTGCGCTCTCCTTGAAGTCGATGC  
CCTCAGCTCGATGCGGTTTACCAGGGTGTGCGCTCGAATTCACCTCGGCGGGTCTTGTAGTTGCCGTCGTCTGAAAGAGATGGTGGCTC  
CTGGACGTAGCCTTCGGGCATGGCGACTTGAAGAAGTCTGCTGCTTCATGTGGTGGGGTACGGCTGAAGCACTGCACGCGTAGGTGAGGTC  
GTCACGAGGGTGGCCAGGGCACGGGACGTTGCCGTTGGTGCAGATGAATTCAGGGTACGTTGCCGTTAGGTGGCATGCCCTCGCCCTCGCCG  
ACACGCTGAATGTGGCCGTTTACGTCGCGCTCCAGCTCGACAGGATGGGCACCCCGGTGAACAGTCTCTCGCCCTTGTCTACCATGTTGGC  
GGTCCCGGGAGAGCCCAACCGCAAGCCGGGACCGCTCAAGCTTCGCTGGAGACGATCCGCGGCCACatggtgagcaaggcgagggagataac  
atggccatcacaaggagttcatgcgcttcaagggtgcacatggagggtccgtgaacggccacaggttcgagatcgagggcgagggcgagggcgccg  
cctacgagggcaccagaccgcaagctgaaggtgaccaagggtggcccccctgcccttcgctgggacatcctgtcccctcagttcatgtacggctc  
caaggcctacgtgaagcaccocgcccacatcccgactacttgaagctgtccttcccggagggttcaagtgaggagcgctgatgaacttcgaggac  
ggcggcggtggtgaccgtgacceaggactcctcctgcaggagggcgagttcatctacaaggtgaagctgcggggcaccacttcccctccgacggcc  
cgtaatgcagaagaagaccatgggtggaggcctcctccgagcggatgtaccccgagggcgccgctgaagggcgagatcaagcagagggctgaa  
gctgaaggacggcgccactacgagctgaggtcaagaccctacaaggccaagaagcccgtgcagctgcccggcgctacaacgctcaacatcaad  
ttggacatcacctcccacaacgaggactacacatcgtggaacagtaacgaacgcccagggcgccactceaccggcgcatggacgagctgtaca  
agttaaGTTTAAACGGGGAGGCTAACTGAAACCGGAAGGAGACAATACCGGAAGGAACCCGCGCTATGACGGCAATAAAAAGACAGAATAAACCG  
ACGGGTGTTGGGTCGTTTGTTCATAAACCGGGGTTGGTCCCAGGGTGGCACTCTGTGATACCCACCGAGACCCATTGGGGCCAAATAGGCC  
GCGTTTCTTCTTTTCCCAACCCACCCCAAGTTCGGGTGAAGGCCAGGGCTCGCAGCCAACGTGCGGGCGGACGGCCCTGCCATAGC...3'

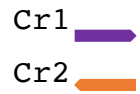





Fig. S3

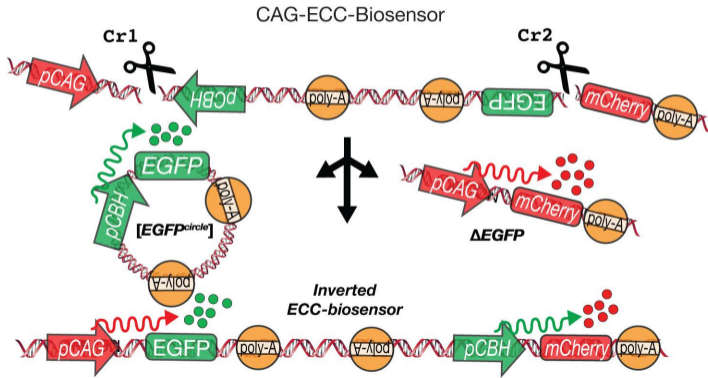

**Fig. S4**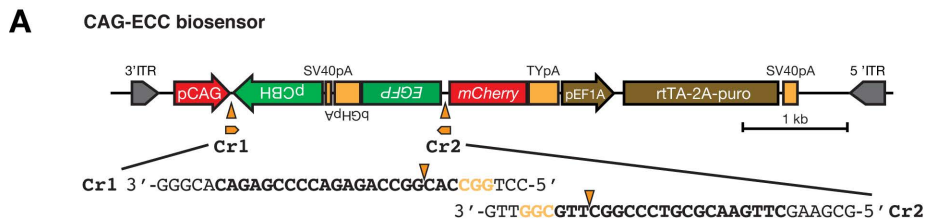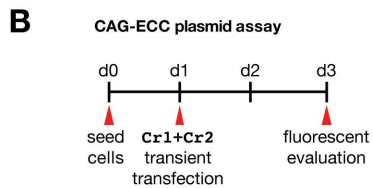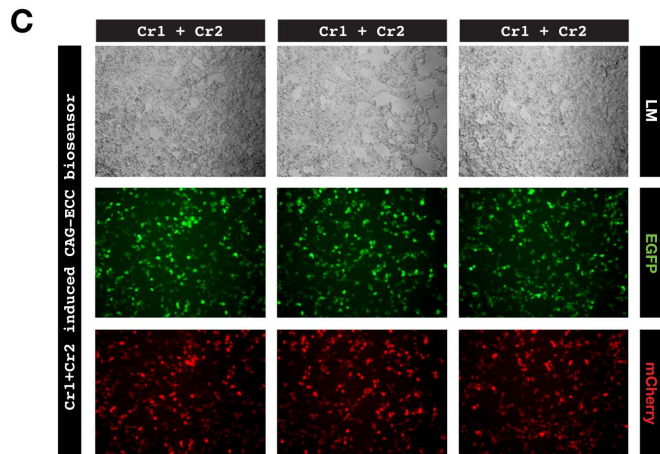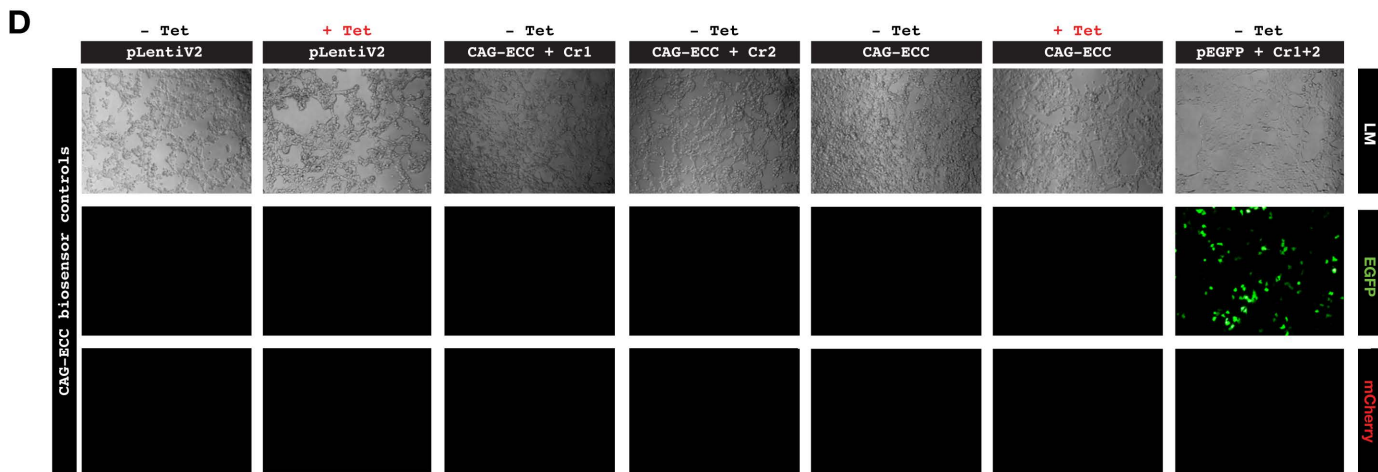

**Fig. S5**

**A CAG-ECC biosensor**

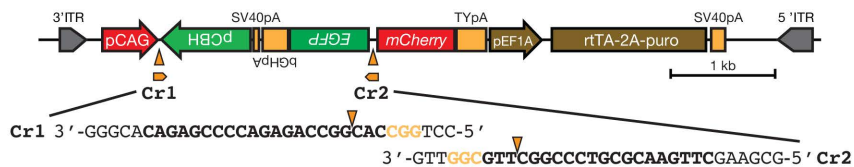

**B CAG-ECC plasmid assay**

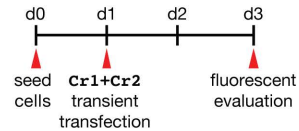

**C**

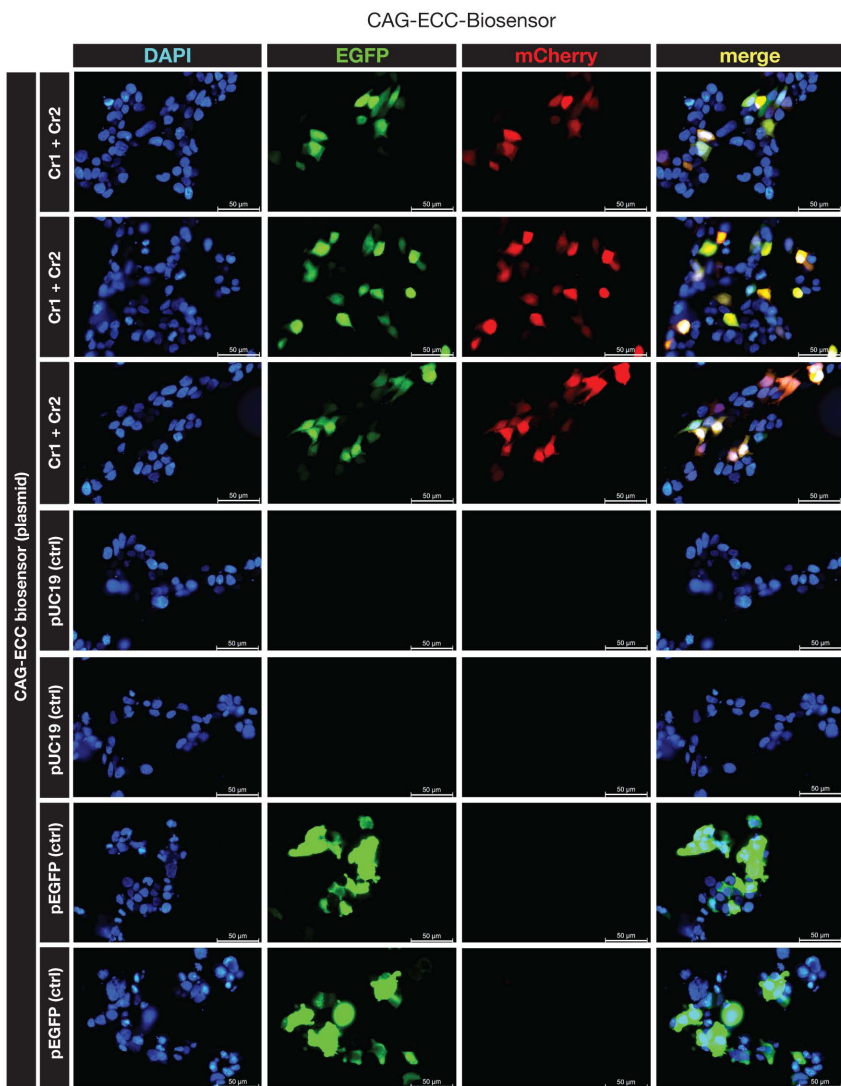

**Fig. S6**

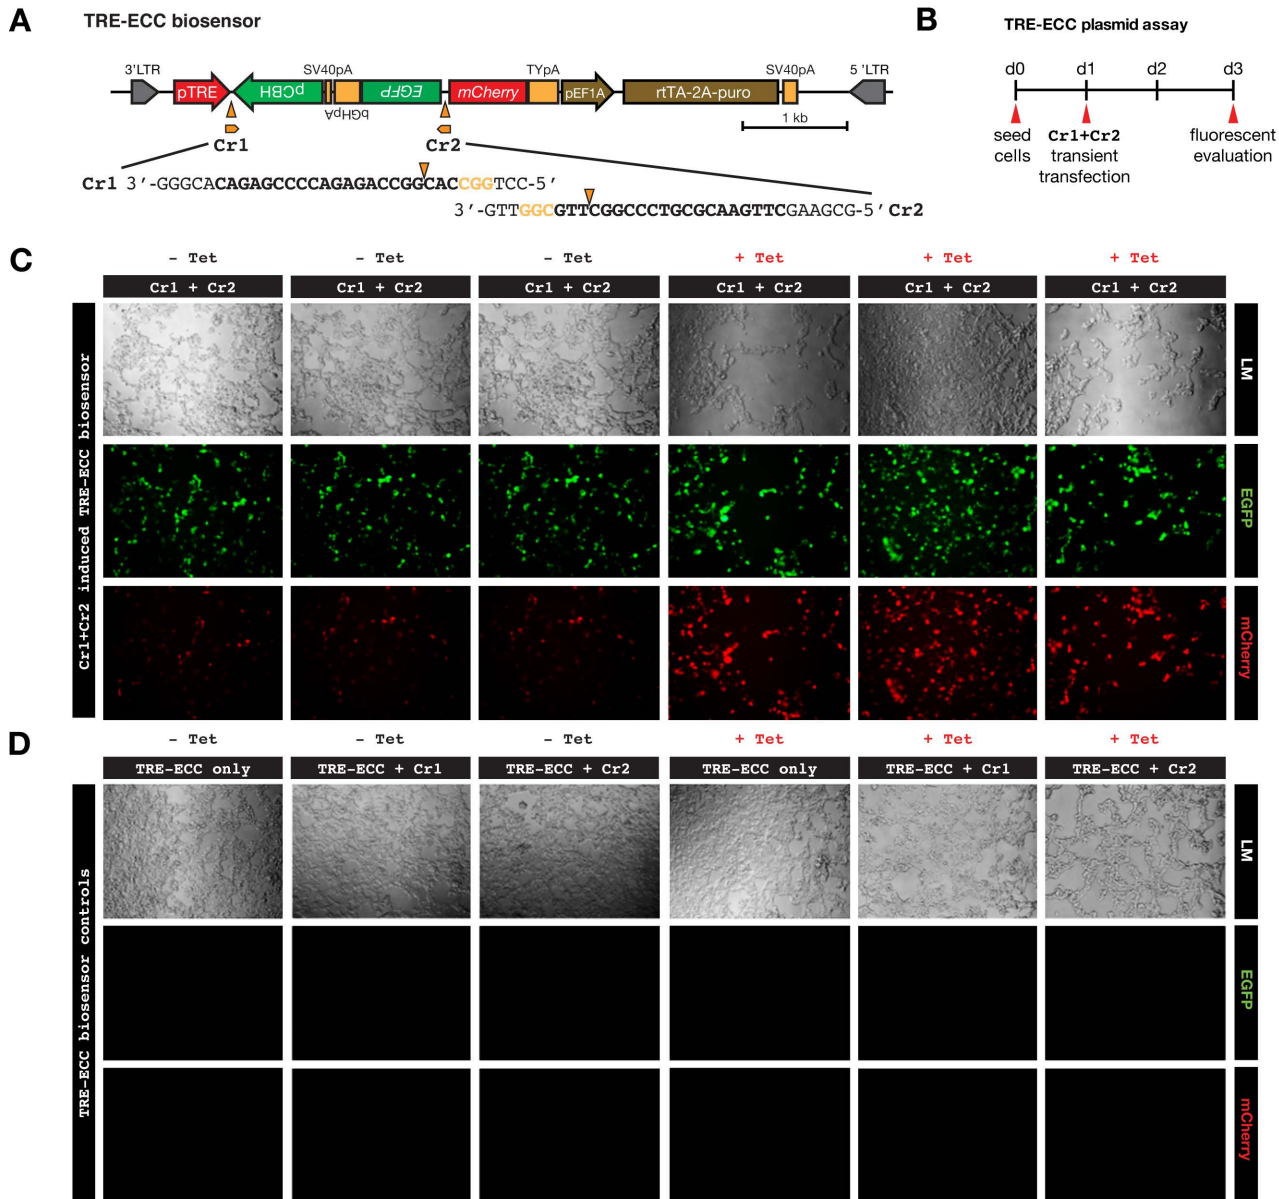

Fig. S7

**A** TRE-ECC biosensor

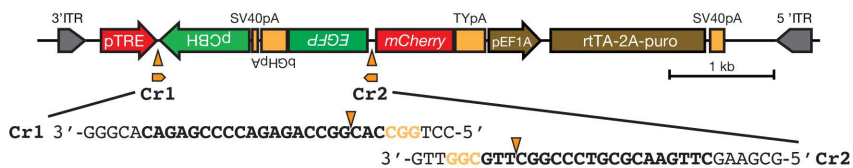

**B** TRE-ECC plasmid assay

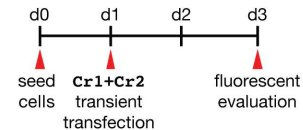

**C**

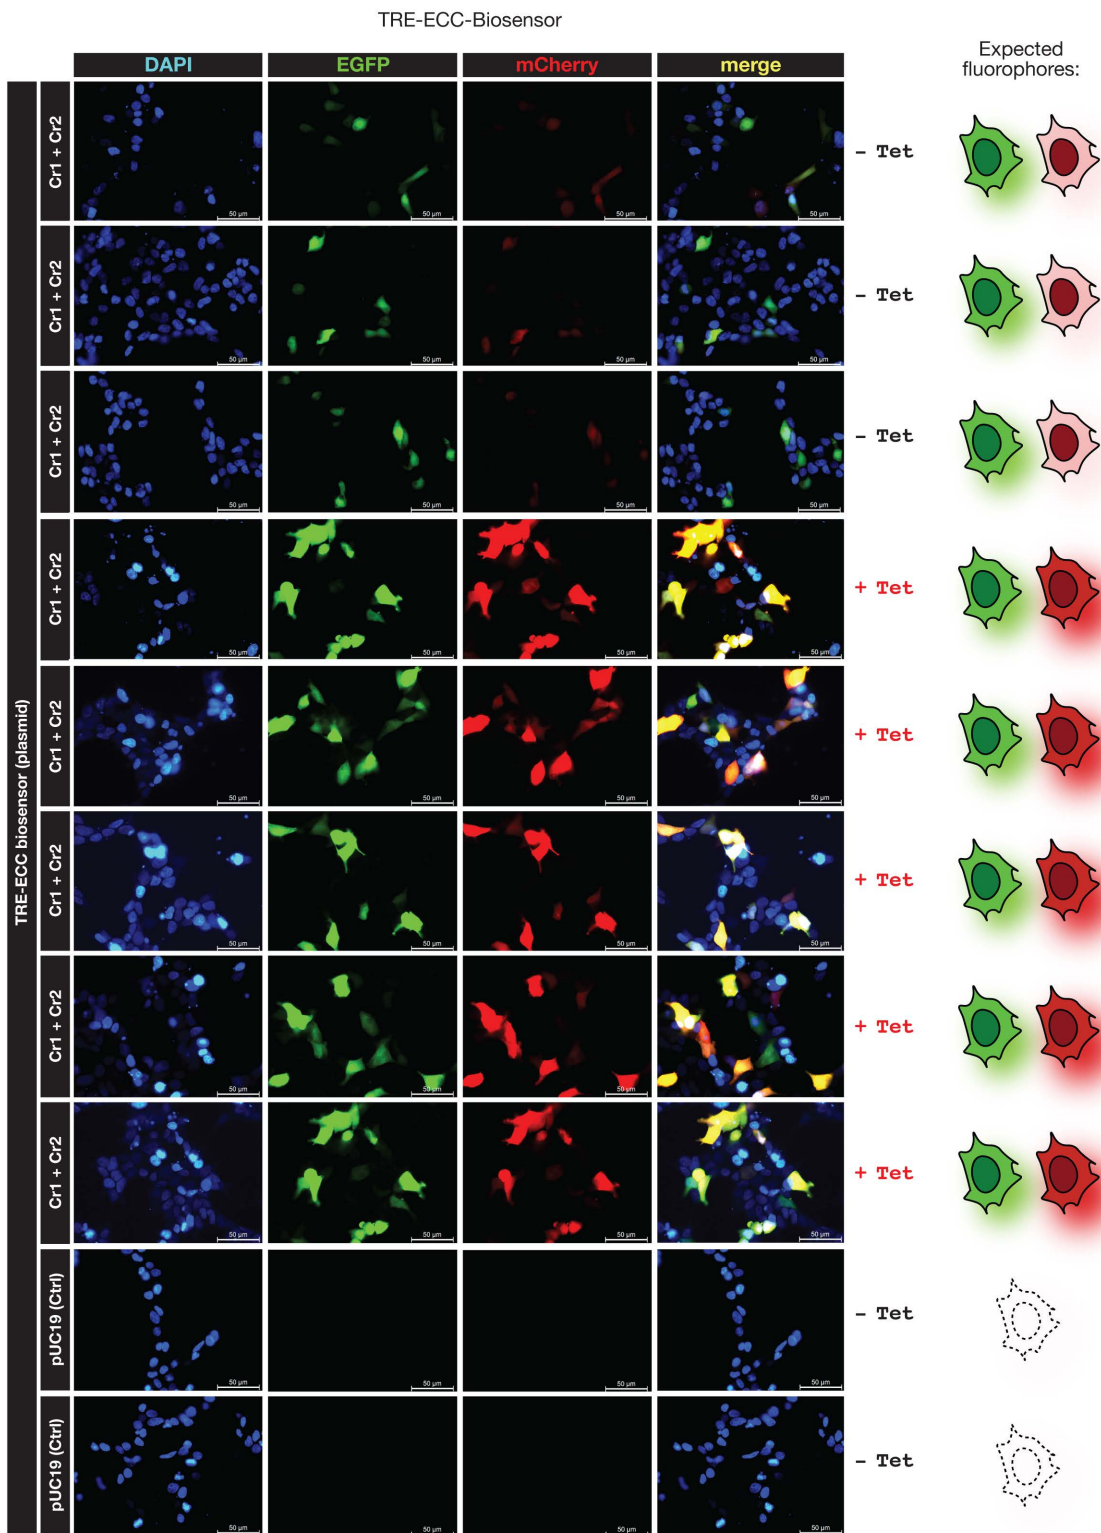

**Fig. S8**

**A**

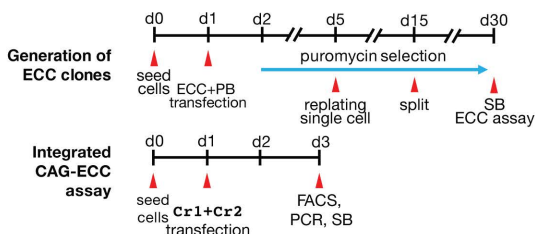

**B**

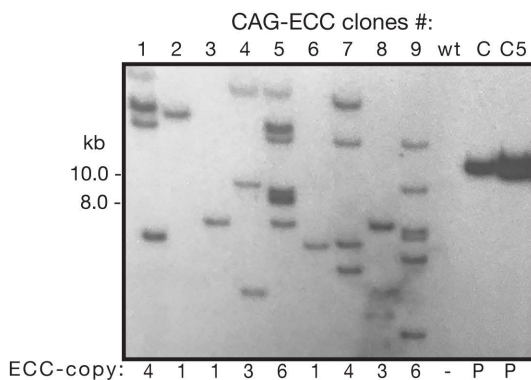

**C**

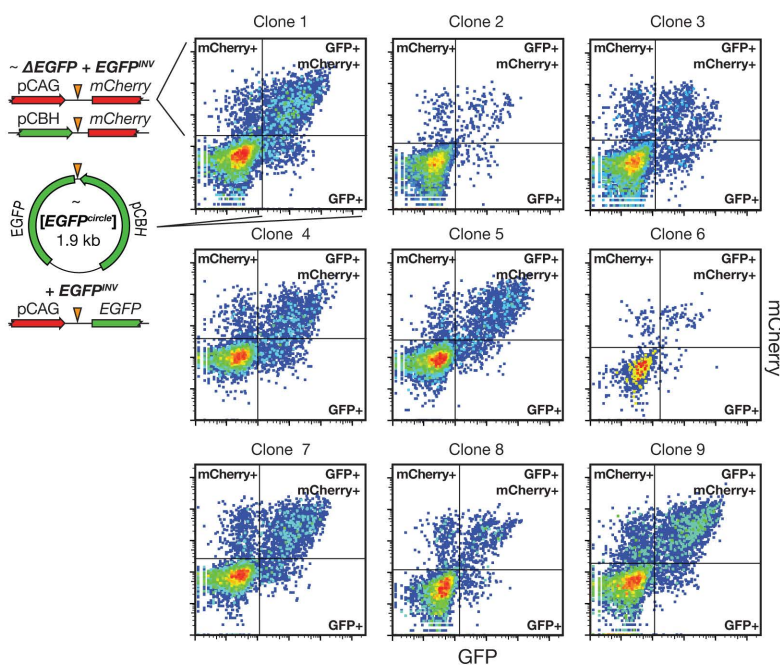

**D**

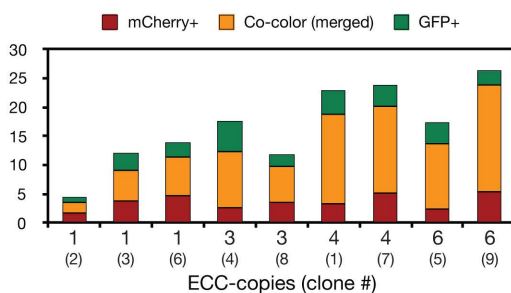

**Fig. S9****A**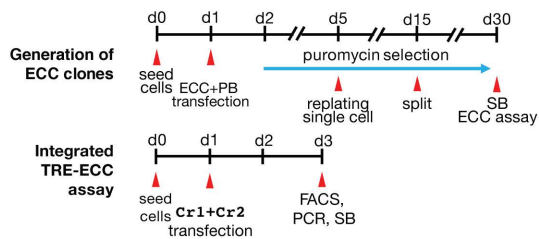**B**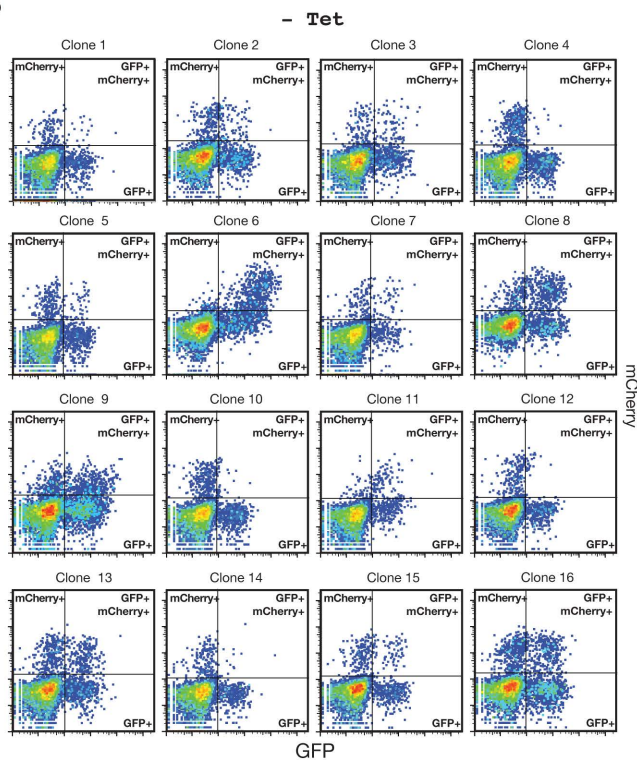**C**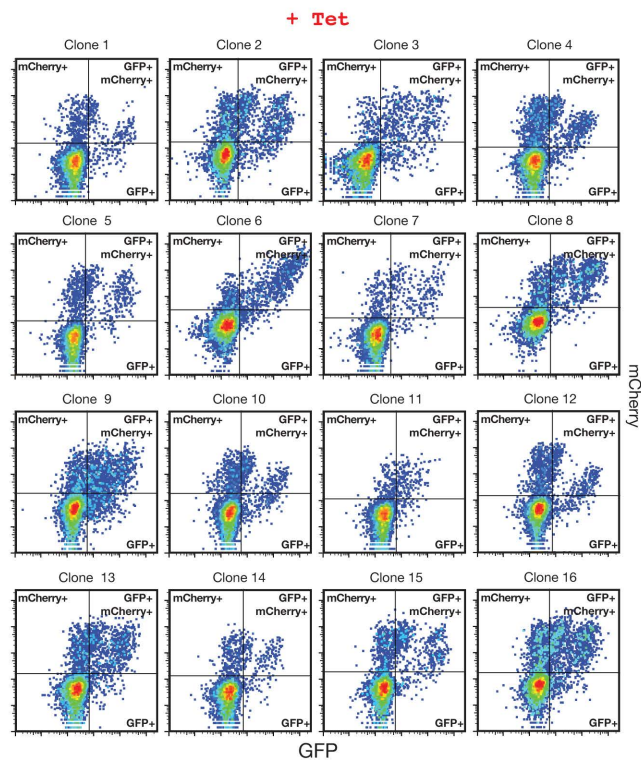



**Fig. S10**

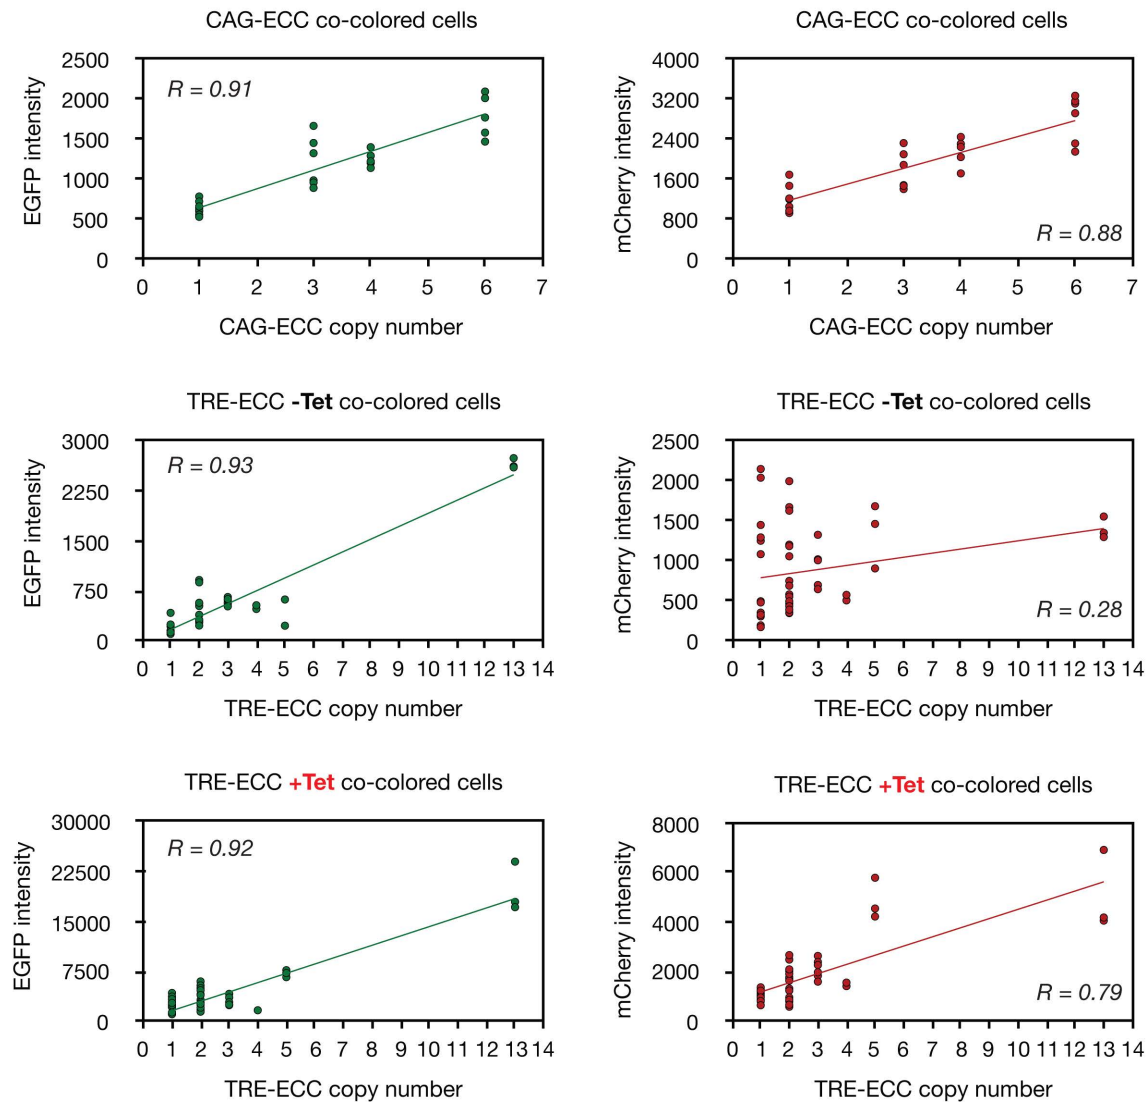

**Fig. S11**

**A**

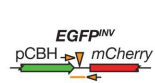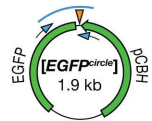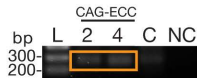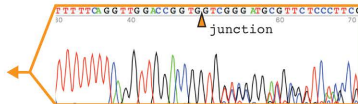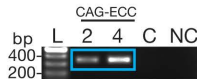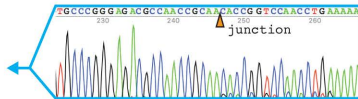

**B**

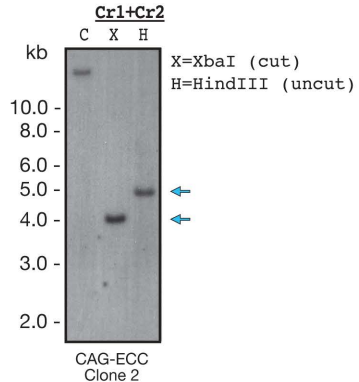

Fig. S12

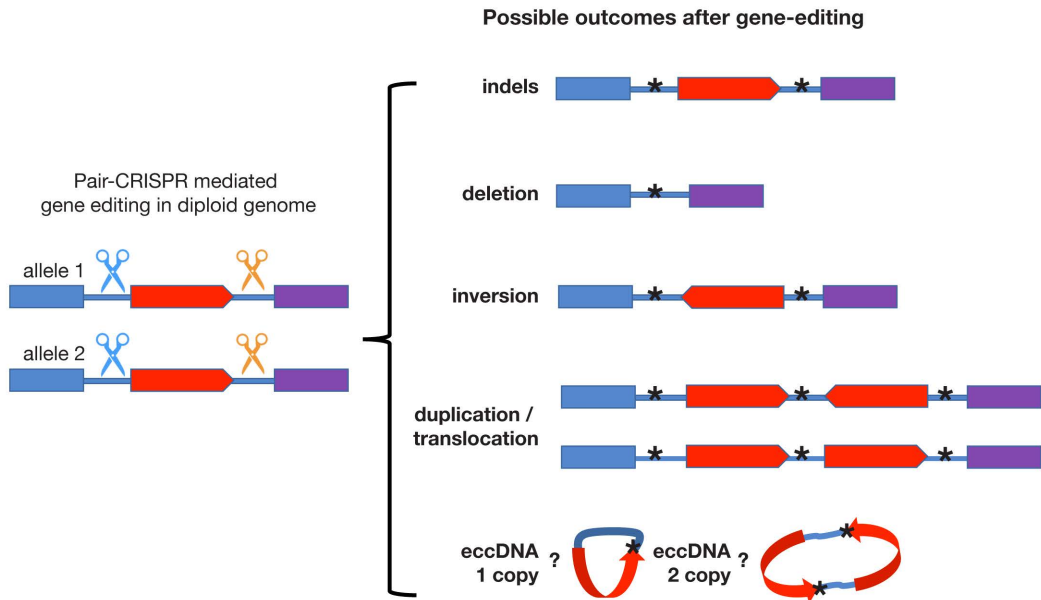

**Fig. S13****A** chr1:159,708,525-159,709,943 locus (hg38)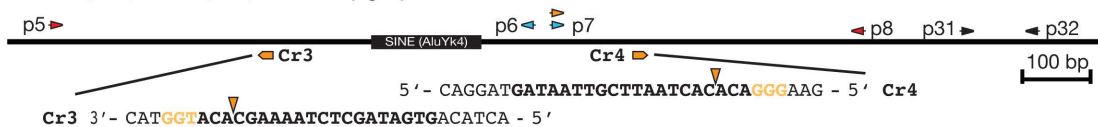**B** [*dsCRP*<sup>circle</sup> 1q23.2:0.57kb] purification by three different methods in HEK cells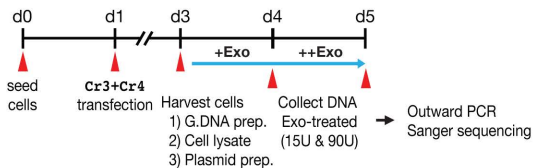**C**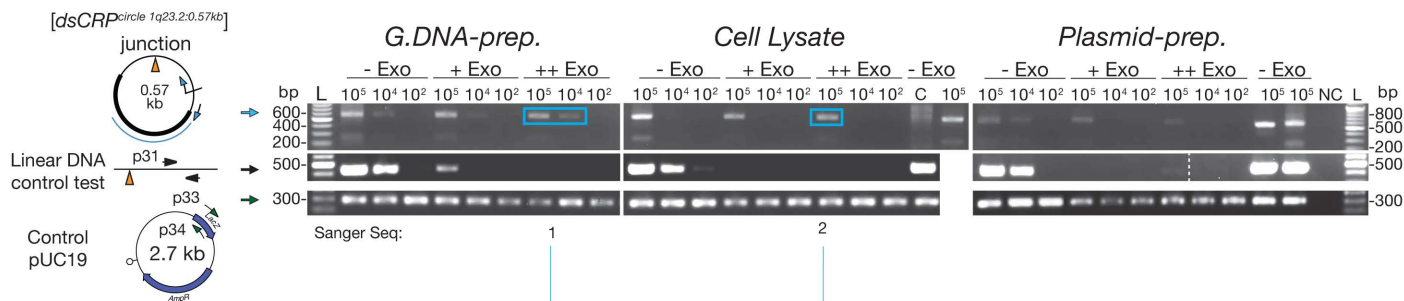**D**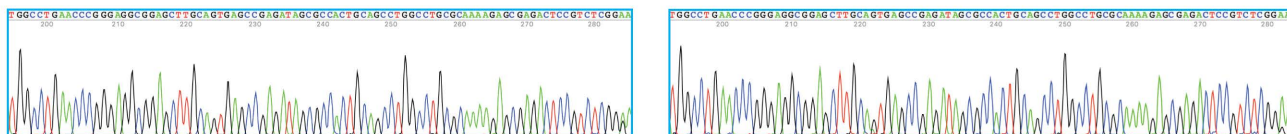



**Fig. S15**

**A** chr10:73,912,103-73,912,498 *UPA (PLAU)* locus (hg38)

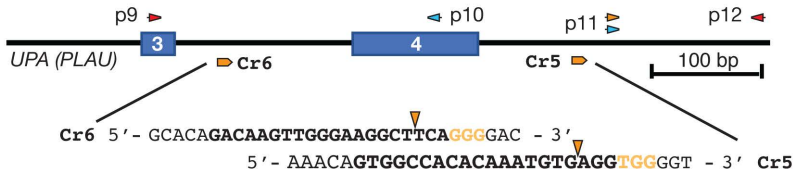

**B** *uPA (PLAU)* deletion test (HEK293T)

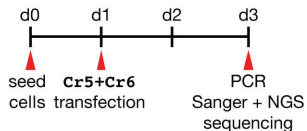

**C**  $\Delta$ *UPA (PLAU)*

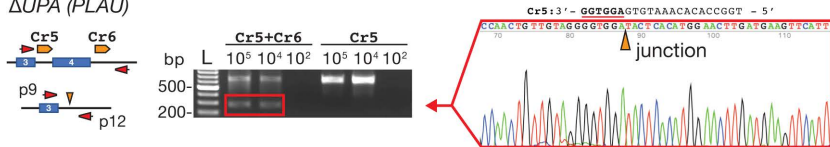

**Fig. S16**

**A** chr19:58,544,963-58,545,472 *TRIM28* locus (hg38)

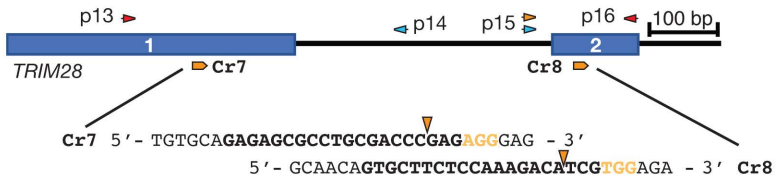

**B** *TRIM28* deletion/inversion test (HEK293T)

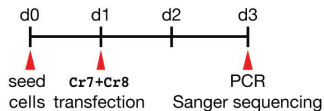

**C**

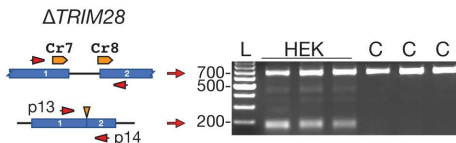

**D**

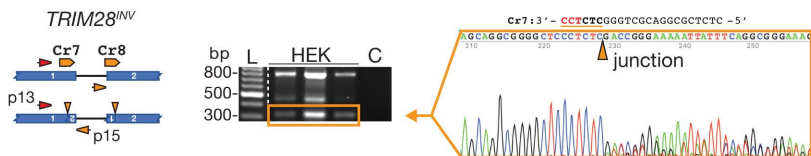

# Fig. S17

## Indels of [TRIM28<sup>circle exon 1-2</sup>] in HEK cells

| T | C | C | A | A | A | G | A | C | A | G | A | G | A | G | G | A | G | C | Reads  | %     | INDEL   | Indel Seq. 5'- |
|---|---|---|---|---|---|---|---|---|---|---|---|---|---|---|---|---|---|---|--------|-------|---------|----------------|
|   |   |   |   |   |   |   |   |   |   |   |   |   |   |   |   |   |   |   | 24,925 | 43.27 | INS     | C              |
|   |   |   |   |   |   |   |   |   |   |   |   |   |   |   |   |   |   |   | 7,579  | 13.16 | DEL     | A              |
|   |   |   |   |   |   |   |   |   |   |   |   |   |   |   |   |   |   |   | 3,911  | 6.79  | BEJ*    | -              |
|   |   |   |   |   |   |   |   |   |   |   |   |   |   |   |   |   |   |   | 2,901  | 5.04  | DEL     | GAGAGGG        |
|   |   |   |   |   |   |   |   |   |   |   |   |   |   |   |   |   |   |   | 2,625  | 4.56  | DEL     | G              |
|   |   |   |   |   |   |   |   |   |   |   |   |   |   |   |   |   |   |   | 2,265  | 3.93  | DEL     | AGACAGAG       |
|   |   |   |   |   |   |   |   |   |   |   |   |   |   |   |   |   |   |   | 2,182  | 3.79  | DEL&INS | AAAGACA & C    |
|   |   |   |   |   |   |   |   |   |   |   |   |   |   |   |   |   |   |   | 2,101  | 3.65  | DEL     | 24bp           |
|   |   |   |   |   |   |   |   |   |   |   |   |   |   |   |   |   |   |   | 1,879  | 3.26  | INS     | CC             |
|   |   |   |   |   |   |   |   |   |   |   |   |   |   |   |   |   |   |   | 1,690  | 2.93  | INS     | TC             |
|   |   |   |   |   |   |   |   |   |   |   |   |   |   |   |   |   |   |   | 1,186  | 2.06  | DEL     | 12 bp          |
|   |   |   |   |   |   |   |   |   |   |   |   |   |   |   |   |   |   |   | 750    | 1.30  | DEL     | GAGAGGGA       |
|   |   |   |   |   |   |   |   |   |   |   |   |   |   |   |   |   |   |   | 540    | 0.94  | DEL     | GAG            |
|   |   |   |   |   |   |   |   |   |   |   |   |   |   |   |   |   |   |   | 241    | 0.42  | INS     | 46 bp          |
|   |   |   |   |   |   |   |   |   |   |   |   |   |   |   |   |   |   |   | 186    | 0.32  | DEL     | 12 bp          |
|   |   |   |   |   |   |   |   |   |   |   |   |   |   |   |   |   |   |   | 171    | 0.30  | DEL     | 11bp           |
|   |   |   |   |   |   |   |   |   |   |   |   |   |   |   |   |   |   |   | !"     | 0.23  | DEL     | 11bp           |



**Fig. S18**

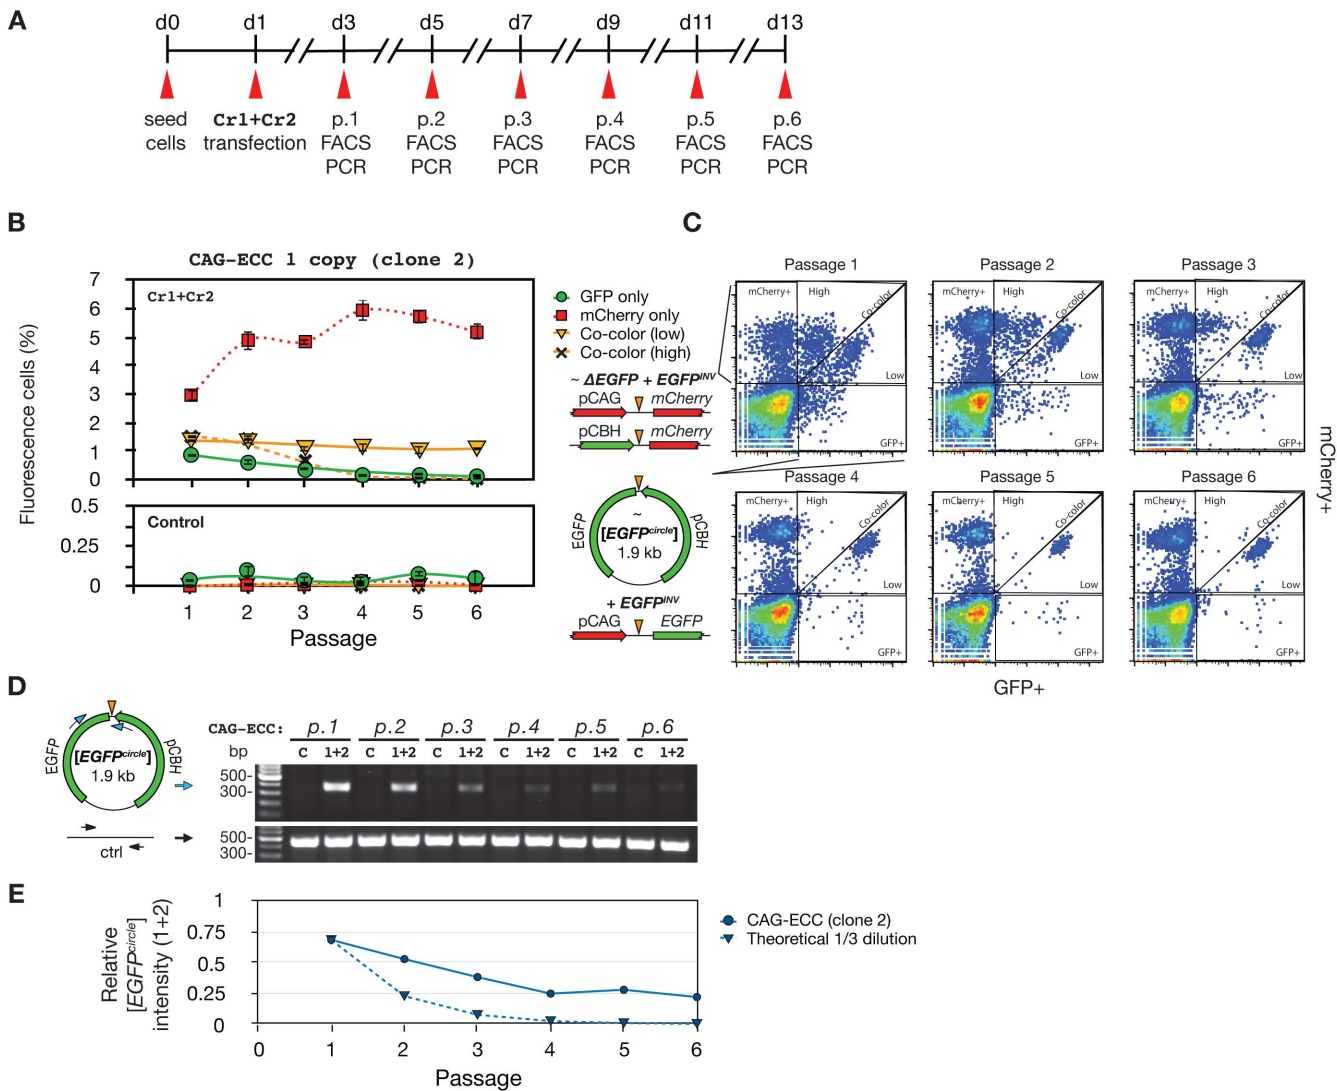

**Fig. S19**

**A**

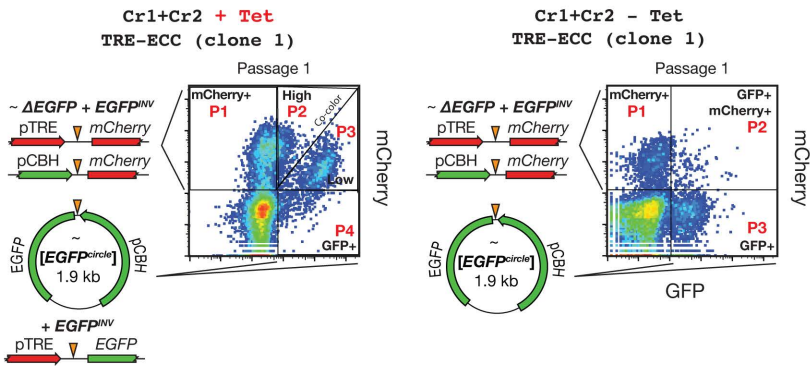

**B**

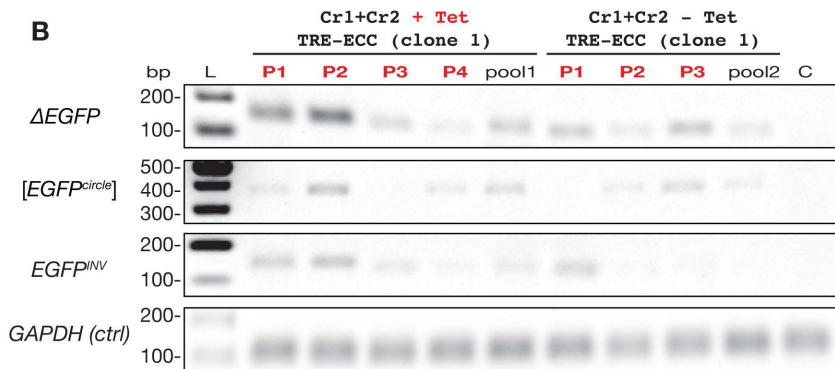

**C**

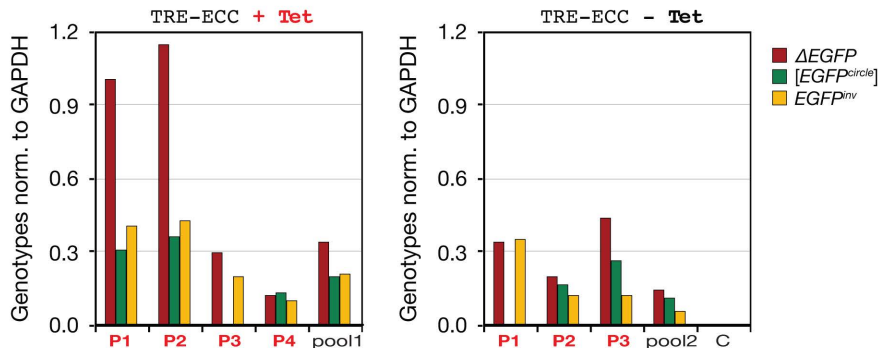

**Fig. S20**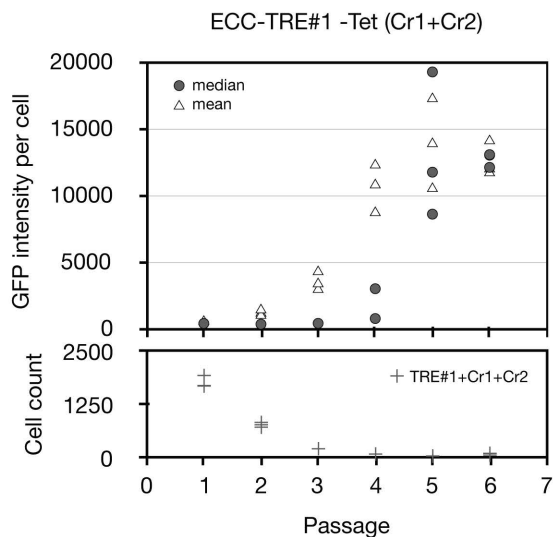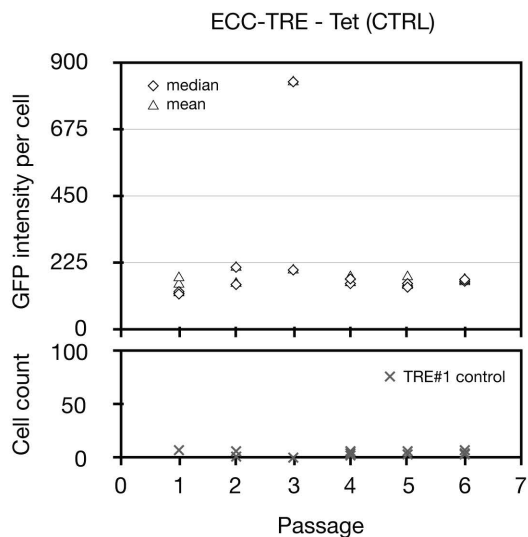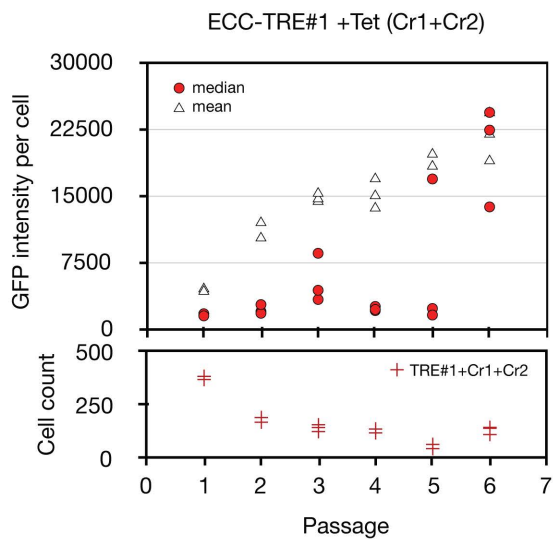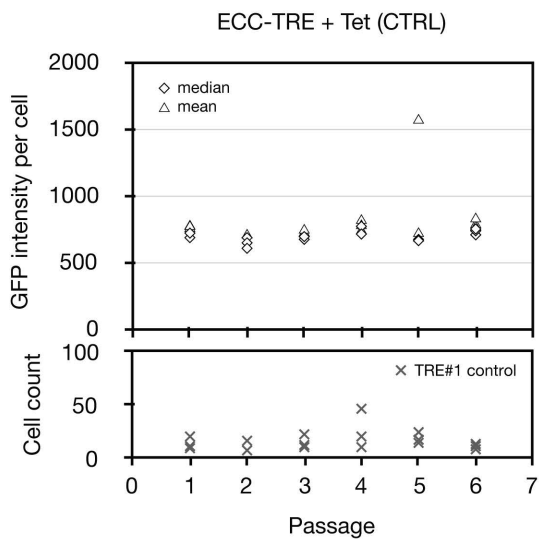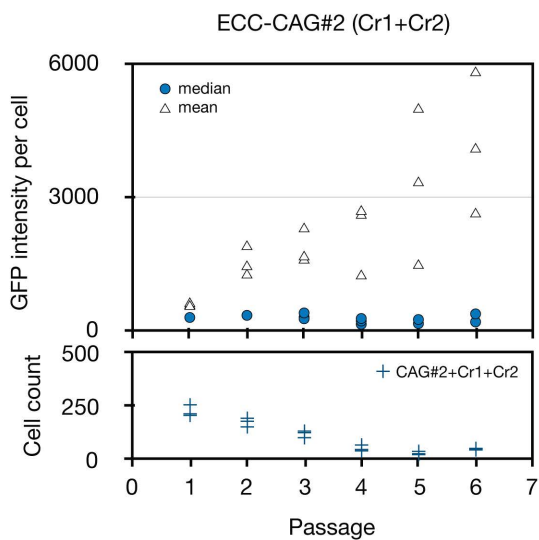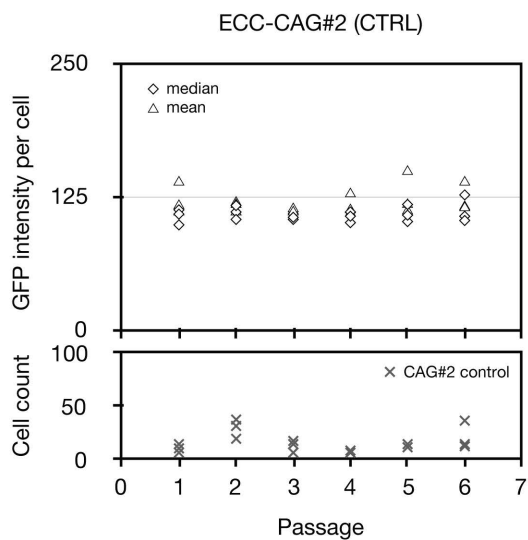

Fig. S21

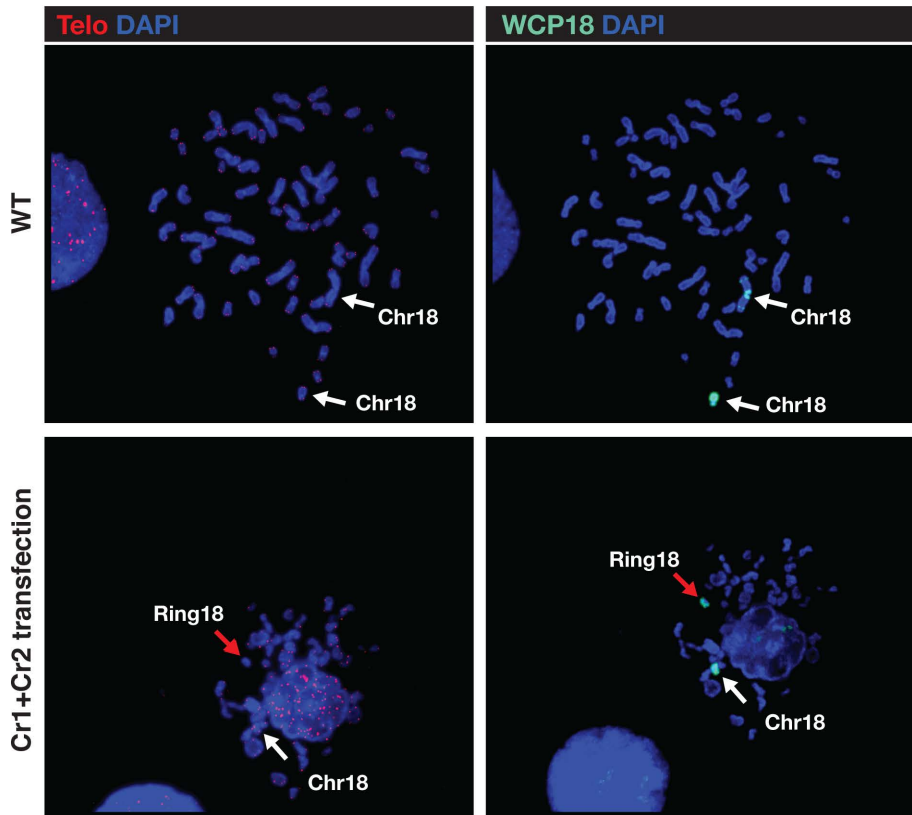

Supplement: gky767_supplemental_files.pdf [file gky767_supplemental_files.pdf]
